# Supplementary material for: Dynamic Evaluation of Ecosystem Service Value in Longyan City Using a Climate-Adjusted Equivalent Factor Method
Source: Research Square preprint supplement (doi:10.21203/rs.3.rs-6177349/v1), 2025-04-02
Supplement: Supplementary file 1 [file d8ef99d6f9dc0f5f67e471ca.docx]

All data generated in this study are available from the corresponding author upon reasonable request.
